# Supplementary material for: Inhibitor and Substrate Binding Induced Stability of HIV-1 Protease against Sequential Dissociation and Unfolding Revealed by High Pressure Spectroscopy and Kinetics
Source: PubMed Central journal article supplement (PMC4362767; doi:10.1371/journal.pone.0119099), 2015-03-17

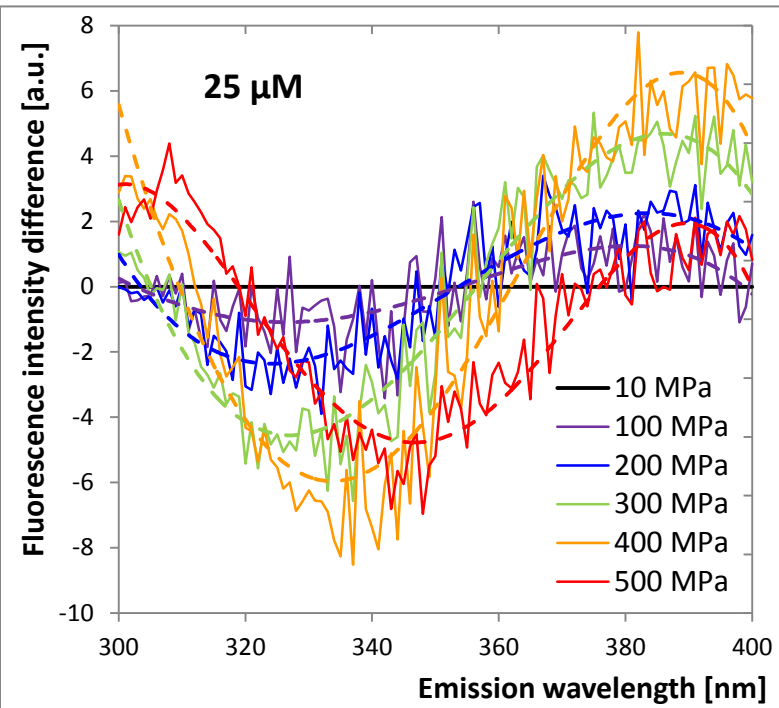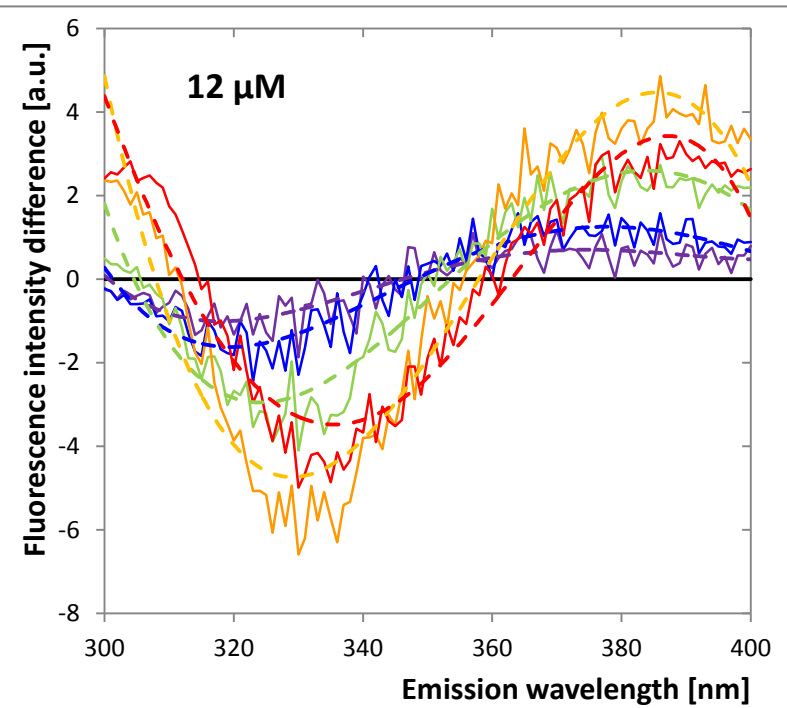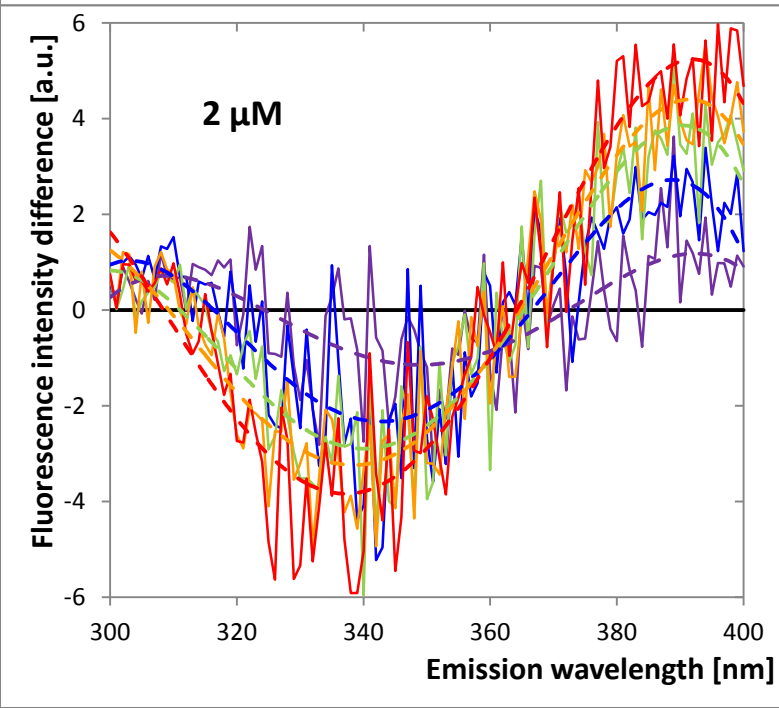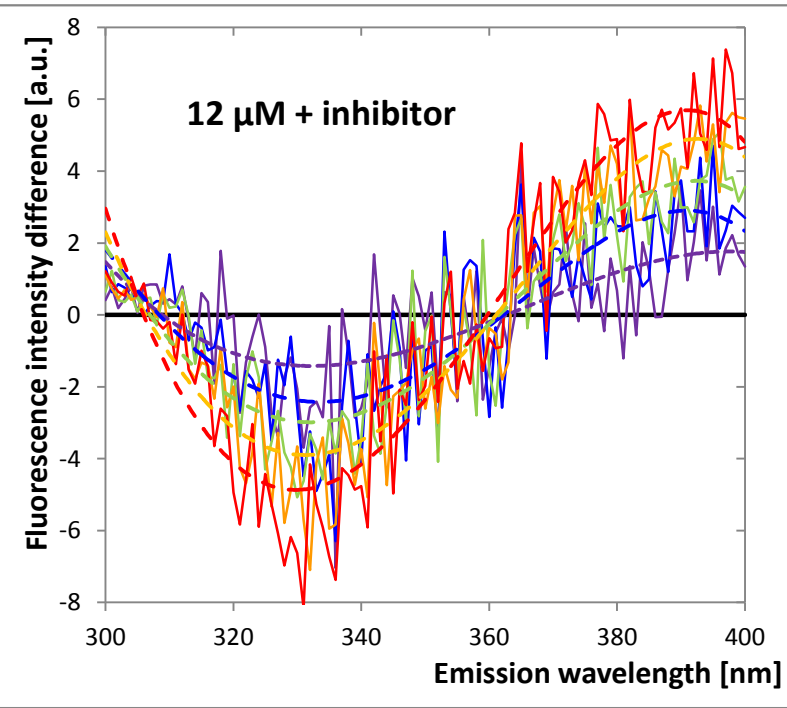

Supplement: pone.0119099.s002.pdf [file pone.0119099.s002.pdf]
